# Supplementary material for: Organic and inorganic polymeric matrix of modified chitosan with algae and coal fly ash for cationic toxic dye removal: Multivariable optimization by Box-Behnken Design
Source: Research Square preprint supplement (doi:10.21203/rs.3.rs-4508283/v1), 2024-06-14
Supplement: Supplementary file 1 [file da21eba0da37a046c0c1bd96.docx]

| Table 1: Factor levels of the BBD design for MV2B removal by CS/Alg/FA | | | | |
| --- | --- | --- | --- | --- |
| Factor name | **Factor code** | **Level of factor** | | |
| **-1** | **0** | **1** |
| CS/Alg/FA Dose (g/100mL) | A | 0.02 | 0.06 | 0.1 |
| Solution pH | B | 4 | 7 | 10 |
| Time (min) | C | 20 | 100 | 180 |

| Table 2: The 3-variables BBD matrix and experimental data for MV2B removal (%) by CS/Alg/FA   | Run | A: CS/Alg/FA dose (g) | B:pH | C:Time (min) | MV2B removal (%) | | --- | --- | --- | --- | --- | | 1 | 0.02 | 4 | 100 | 15.5 | | 2 | 0.1 | 4 | 100 | 65.1 | | 3 | 0.02 | 10 | 100 | 58.4 | | 4 | 0.1 | 10 | 100 | 78.4 | | 5 | 0.02 | 7 | 20 | 4.8 | | 6 | 0.1 | 7 | 20 | 63.5 | | 7 | 0.02 | 7 | 180 | 50.3 | | 8 | 0.1 | 7 | 180 | 65.2 | | 9 | 0.06 | 4 | 20 | 5.7 | | 10 | 0.06 | 10 | 20 | 30.7 | | 11 | 0.06 | 4 | 180 | 17.9 | | 12 | 0.06 | 10 | 180 | 59.9 | | 13 | 0.06 | 7 | 100 | 63.4 | | 14 | 0.06 | 7 | 100 | 60.5 | | 15 | 0.06 | 7 | 100 | 65.8 | | 16 | 0.06 | 7 | 100 | 66.4 | | 17 | 0.06 | 7 | 100 | 63.6 | |
| --- | --- | --- | --- | --- | --- | --- | --- | --- | --- | --- | --- | --- | --- | --- | --- | --- | --- | --- | --- | --- | --- | --- | --- | --- | --- | --- | --- | --- | --- | --- | --- | --- | --- | --- | --- | --- | --- | --- | --- | --- | --- | --- | --- | --- | --- | --- | --- | --- | --- | --- | --- | --- | --- | --- | --- | --- | --- | --- | --- | --- | --- | --- | --- | --- | --- | --- | --- | --- | --- | --- | --- | --- | --- | --- | --- | --- | --- | --- | --- | --- | --- | --- | --- | --- | --- | --- | --- | --- | --- | --- |

| Table 3: BET analysis of CS/Alg/FA | |
| --- | --- |
| Parameters | **CS/Alg/FA** |
| Surface Area (m2/g) | 1.43 |
| Langmuir Surface Area (m2/g) | 16.5 |
| Total Volume in Pore (cm3/g) | 0.0023 |
| Average Pore Diameter (nm) | 14.4 |

| Table 4: ANOVA test results for MV2B removal by CS/Alg/FA | | | | | | |
| --- | --- | --- | --- | --- | --- | --- |
| Source | **Sum of Squares** | **df** | **Mean Square** | **F-value** | **p-value** | **Significant** |
| Model | 9155.94 | 9 | 1017.33 | 165.47 | < 0.0001 | * |
| A-Dose | 2563.28 | 1 | 2563.28 | 416.92 | < 0.0001 | * |
| B-pH | 1897.28 | 1 | 1897.28 | 308.59 | < 0.0001 | * |
| C-Time | 981.24 | 1 | 981.24 | 159.60 | < 0.0001 | * |
| AB | 219.04 | 1 | 219.04 | 35.63 | 0.0006 | * |
| AC | 479.61 | 1 | 479.61 | 78.01 | < 0.0001 | * |
| BC | 72.25 | 1 | 72.25 | 11.75 | 0.0110 | * |
| A² | 63.88 | 1 | 63.88 | 10.39 | 0.0146 | * |
| B² | 767.94 | 1 | 767.94 | 124.91 | < 0.0001 | * |
| C² | 2020.33 | 1 | 2020.33 | 328.61 | < 0.0001 | * |
| Residual | 43.04 | 7 | 6.15 |  |  |  |
| Lack of Fit | 20.79 | 3 | 6.93 | 1.25 | 0.4041 | # |
| Pure Error | 22.25 | 4 | 5.56 |  |  |  |
| Cor total | 9198.98 | 16 |  |  |  |  |
| R2 | 0.9953 |  |  |  |  |  |
| Adjusted R2 | 0.9893 |  |  |  |  |  |

* Significant; # not significant.

| Table 5: Adsorption kinetics & isotherms nonlinear models and adsorption thermodynamic.   | **Models** | **Equations** | **Parameters** | | --- | --- | --- | | Pseudo-first order (PFO) |  | : pseudo-first-order rate constant (1/min) | | Pseudo-second order (PSO) |  | : pseudo-second-order rate constant (g/mg min) | | Langmuir |  | : monolayer capacity (mg/g)  *KL* : Langmuir constant (L/mg) | | Freundlich |  | *KF*: Freundlich constant (mg/g) (L/mg)1/n  *n*: adsorption intensity | | Temkin |  | : Temkin constant (L/mg)  : heat of adsorption(J/mol) | | Adsorption thermodynamic |  | ΔG°: Gibbs free energy change | |  | ΔS°: Entropy change  ΔH°: Enthalpy change | |  | *kd* : Partition coefficient | |
| --- | --- | --- | --- | --- | --- | --- | --- | --- | --- | --- | --- | --- | --- | --- | --- | --- | --- | --- | --- | --- | --- | --- | --- | --- | --- |

| Table 6: Kinetic model data for MV2B adsorption by CS/Alg/FA (CS/Alg/FA dose=0.1g/100mL; pH=10; temperature=25°C; agitation speed=80strokes/min) | | | | | | | | |
| --- | --- | --- | --- | --- | --- | --- | --- | --- |
| **Concentration (mg/L)** | ***q*e exp. (mg/g)** | **PFO** | | |  | **PSO** | | |
| ***q*e cal (mg/g)** | ***k*1 (1/min)** | ***R2*** |  | ***q*e cal (mg/g)** | ***k*2 x 10-2 *(g/mg.min)*** | ***R*2** |
| **20** | 14.5 | 14.5 | 3.54 | 1.00 |  | 14.7 | 0.58 | 0.94 |
| **50** | 25.6 | 25.8 | 0.77 | 0.99 |  | 25.9 | 0.33 | 0.99 |
| **80** | 39.3 | 40.6 | 0.51 | 0.99 |  | 41.1 | 0.06 | 0.99 |
| **120** | 44.4 | 47.7 | 0.62 | 0.99 |  | 47.8 | 0.11 | 0.99 |
| **150** | 52.8 | 54.2 | 0.87 | 0.99 |  | 54.3 | 0.27 | 0.99 |
| **200** | 56.1 | 48.9 | 0.09 | 0.93 |  | 54.1 | 0.002 | 0.97 |
| **250** | 61.4 | 56.9 | 0.05 | 0.95 |  | 64.1 | 0.001 | 0.98 |

| Table 7: Isotherm model parameters for MV2B removal by CS/Alg/FA | | |
| --- | --- | --- |
| **Adsorption isotherm** | **Parameter** | **Value** |
| Langmuir | *qmax*(mg/g) | 63.4 |
| *Ka* (L/mg) | 0.12 |
| *R2* | 0.94 |
|  |  |
| Freundlich | *Kf*  (mg/g) (L/mg)1/n | 23.7 |
| *n* | 5.06 |
| *R2* | 0.88 |
|  |  |
| Temkin | *KT*(L/mg) | 4.31 |
| *b*T (J/mol) | 257.9 |
| *R2* | 0.94 |

| Table 8: Comparison of adsorption capacity of CS-BD/Alg/FA for MV2B removal with other adsorbents | | |
| --- | --- | --- |
| Adsorbents employed for MV dye removal | **Maximum adsorption capacity (mg/g)** | **Reference** |
| CS/Alg/FA | 63.4 | Present study |
| Coal-based activated carbon | 134.1 | [61] |
| Clay/starch/Fe3O4 nanocomposite | 29.67 | [62] |
| Montmorillonite clay/starch/CoFe2O4 nanocomposite | 47.51 | [63] |
| Zeolite Clay/Fe-Al Hydrotalcite composite | 81.98 | [64] |
| Algae modified Schiff base-chitosan benzaldehyde composite | 126.51 | [65] |
| Magnetite carboxymethylcellulose | 107.78 | [66] |
| Glutaraldehyde cross-linked alginate/sepiolite hydrogel capsules | 357.1 | [67] |
| porous material polyacrylamide/  astragalus membranaceus/attapulgite | 709.13 | [68] |
| Magnetic chitosan microspheres | 128.84 | [69] |

| Table 9 : Thermodynamic parameters of MV2B removal by Cs-Alg-FA | | | | |
| --- | --- | --- | --- | --- |
| Temperature (K) | ***lnkd*** | **∆G (kJ/mol)** | **∆H (kJ/mol)** | **∆S (J/mol.K)** |
| 298.15 | 0.54 | -1.26 | 42.6 | 0.15 |
| 308.15 | 1.07 | -2.73 |
| 318.15 | 1.48 | -4.21 |
| 328.15 | 2.16 | -5.68 |
